# Supplementary material
Source: publisher site journal article supplement (https://www.dovepress.com/get_supplementary_file.php?f=271543.docx)
Supplement: Supplementary file 1 [file get_supplementary_file.php]

# Supplemental Table Distribution of ICD-8 and ICD-10 codes among 5,053 patients in the Motor Neuron Diseases Cohort according to diagnoses qualifying for the cohort membership

| Classification | Diagnosis description | N |
| --- | --- | --- |
| ICD-8 | 34809 Amyotrophic lateral sclerosis | 1,146 |
| ICD-8 | 34819 Progressive bulbar palsy | 94 |
| ICD-8 | 34820 Progressive spinal paralysis | 111 |
| ICD-8 | 34829 Progressive muscular atrophy | 48 |
| ICD-8 | 34899 Motor neuron disease other and unspecified | 266 |
| ICD-10 | G12.2 Motor neuron diseases | 2,925 |
| ICD-10 | G12.2A Progressive spinal muscular atrophy or G12.2B Progressive myelopathic atrophya | 10 |
| ICD-10 | G12.2C Duchenne-Aran’s atrophy | 37 |
| ICD-10 | G12.2D Progressive muscular atrophy | 5 |
| ICD-10 | G12.2E Progressive spinal paralysis | 5 |
| ICD-10 | G12.2F Progressive bulbar palsy | 10 |
| ICD-10 | G12.2G Amyotrophic lateral sclerosis | 396 |
| Total |  | 5,053 |

Abbreviations: ICD-8: The International Classification of Diseases 8th Revision, ICD-10: The International Classification of Diseases 10th Revision

a Categories combined as individual counts are too small to report.
